# Supplementary material for: External electric field effects on the σ-hole and lone-pair hole interactions of group V elements: a comparative investigation
Source: Royal Society of Chemistry journal article supplement (doi:10.1039/d0ra09765a), 2021-01-01
Supplement: d0ra09765a1.pdf [file d0ra09765a1.pdf]

# External electric field effect on $\sigma$ -hole and lone-pair hole interactions of Group V elements: A comparative investigation

Mahmoud A. A. Ibrahim,<sup>1,\*</sup> Sherif M. A. Saad,<sup>1</sup> Jabir H. Al-Fahemi,<sup>2</sup> Gamal A. H. Mekhemer,<sup>1</sup>  
Saleh A. Ahmed,<sup>2,3</sup> Ahmed M. Shawky<sup>4,5</sup> and Nayra A. M. Moussa<sup>1</sup>

<sup>1</sup> Computational Chemistry Laboratory, Chemistry Department, Faculty of Science, Minia University, Minia 61519, Egypt

<sup>2</sup> Chemistry Department, Faculty of Applied Sciences, Umm Al-Qura University, Makkah 21955, Saudi Arabia

<sup>3</sup> Chemistry Department, Faculty of Science, Assiut University, Assiut 71516, Egypt

<sup>4</sup> Science and Technology Unit (STU), Umm Al-Qura University, Makkah 21955, Saudi Arabia

<sup>5</sup> Central Laboratory for Micro-analysis, Minia University, Minia 61519, Egypt

\* Corresponding author: Mahmoud A. A. Ibrahim; [m.ibrahim@compchem.net](mailto:m.ibrahim@compchem.net)

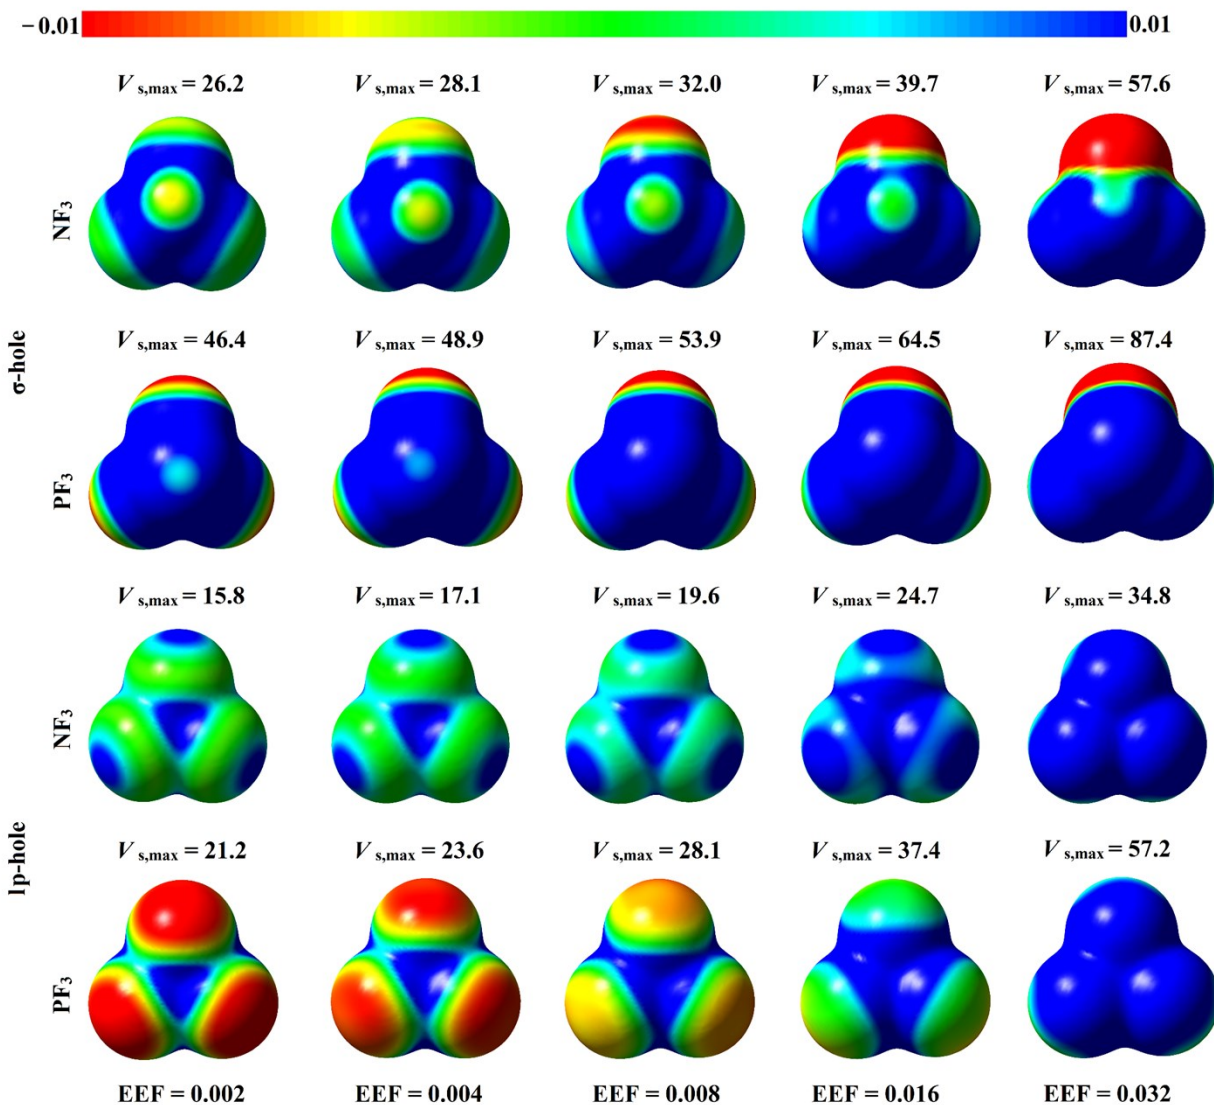

**Figure S1.** Molecular electrostatic potential (MEP) maps plotted onto 0.002 au electron density contours under the influence of positively-directed external electric field (EEF) (values in au). The electrostatic potential varies from  $-0.01$  (red) to  $+0.01$  (blue) au. The calculated maximum positive electrostatic potentials ( $V_{s,max}$ ) at  $\sigma$ -hole and lp-hole under the directed EEF in NF<sub>3</sub> and PF<sub>3</sub> molecules are given in kcal/mol.

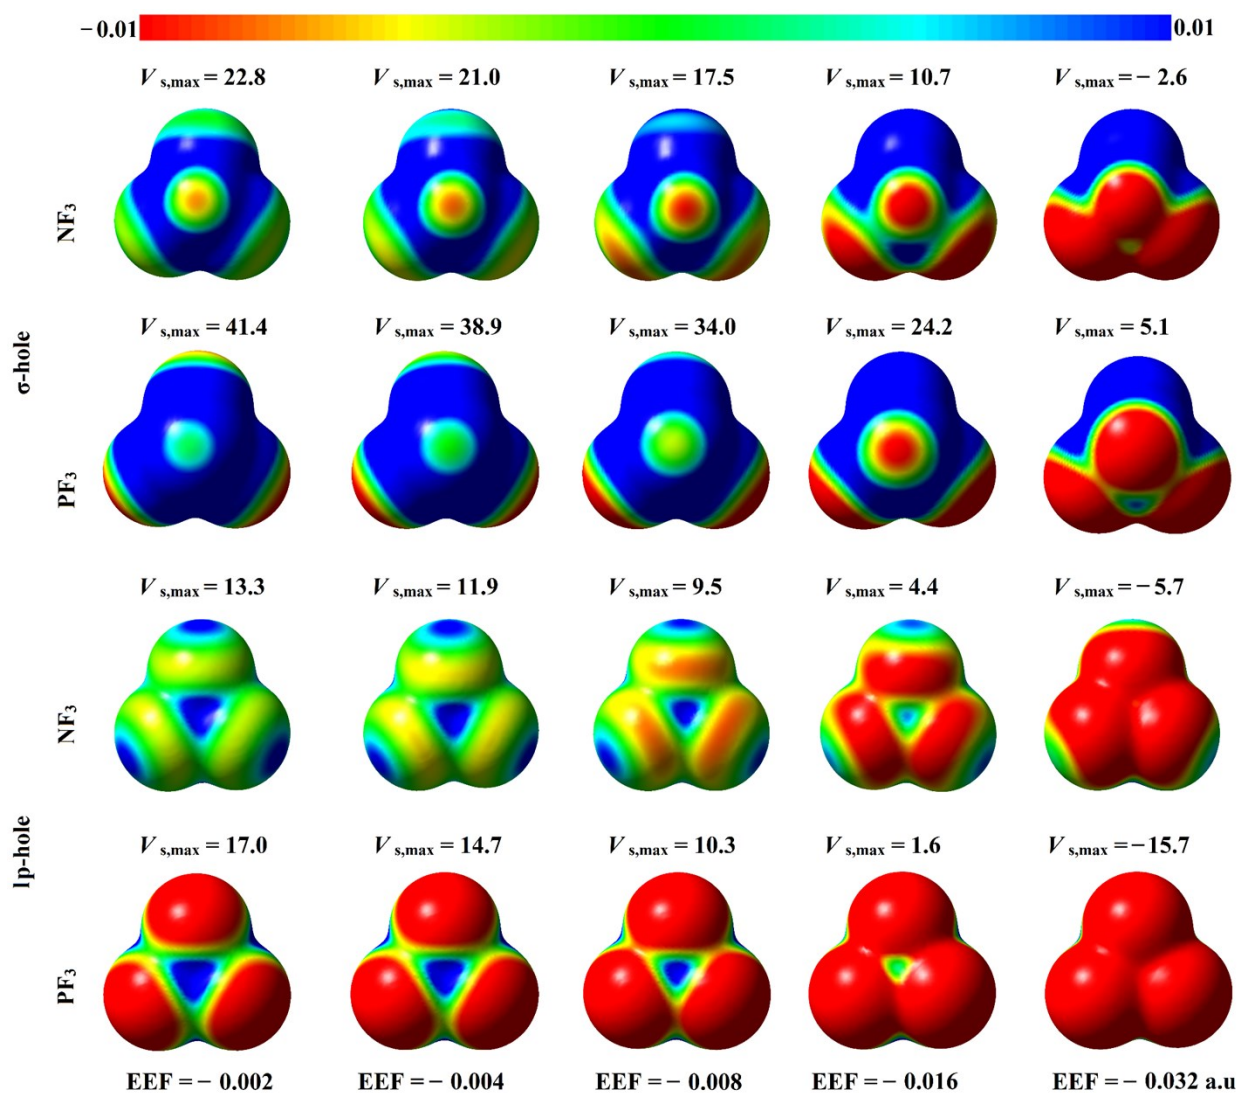

**Figure S2.** Molecular electrostatic potential (MEP) maps plotted onto 0.002 au electron density contours under the influence of negatively-directed external electric field (EEF) (values in au). The electrostatic potential varies from  $-0.01$  (red) to  $+0.01$  (blue) au. The calculated maximum positive electrostatic potentials ( $V_{s,max}$ ) at  $\sigma$ -hole and lp-hole under the directed EEF in  $NF_3$  and  $PF_3$  molecules are given in kcal/mol.

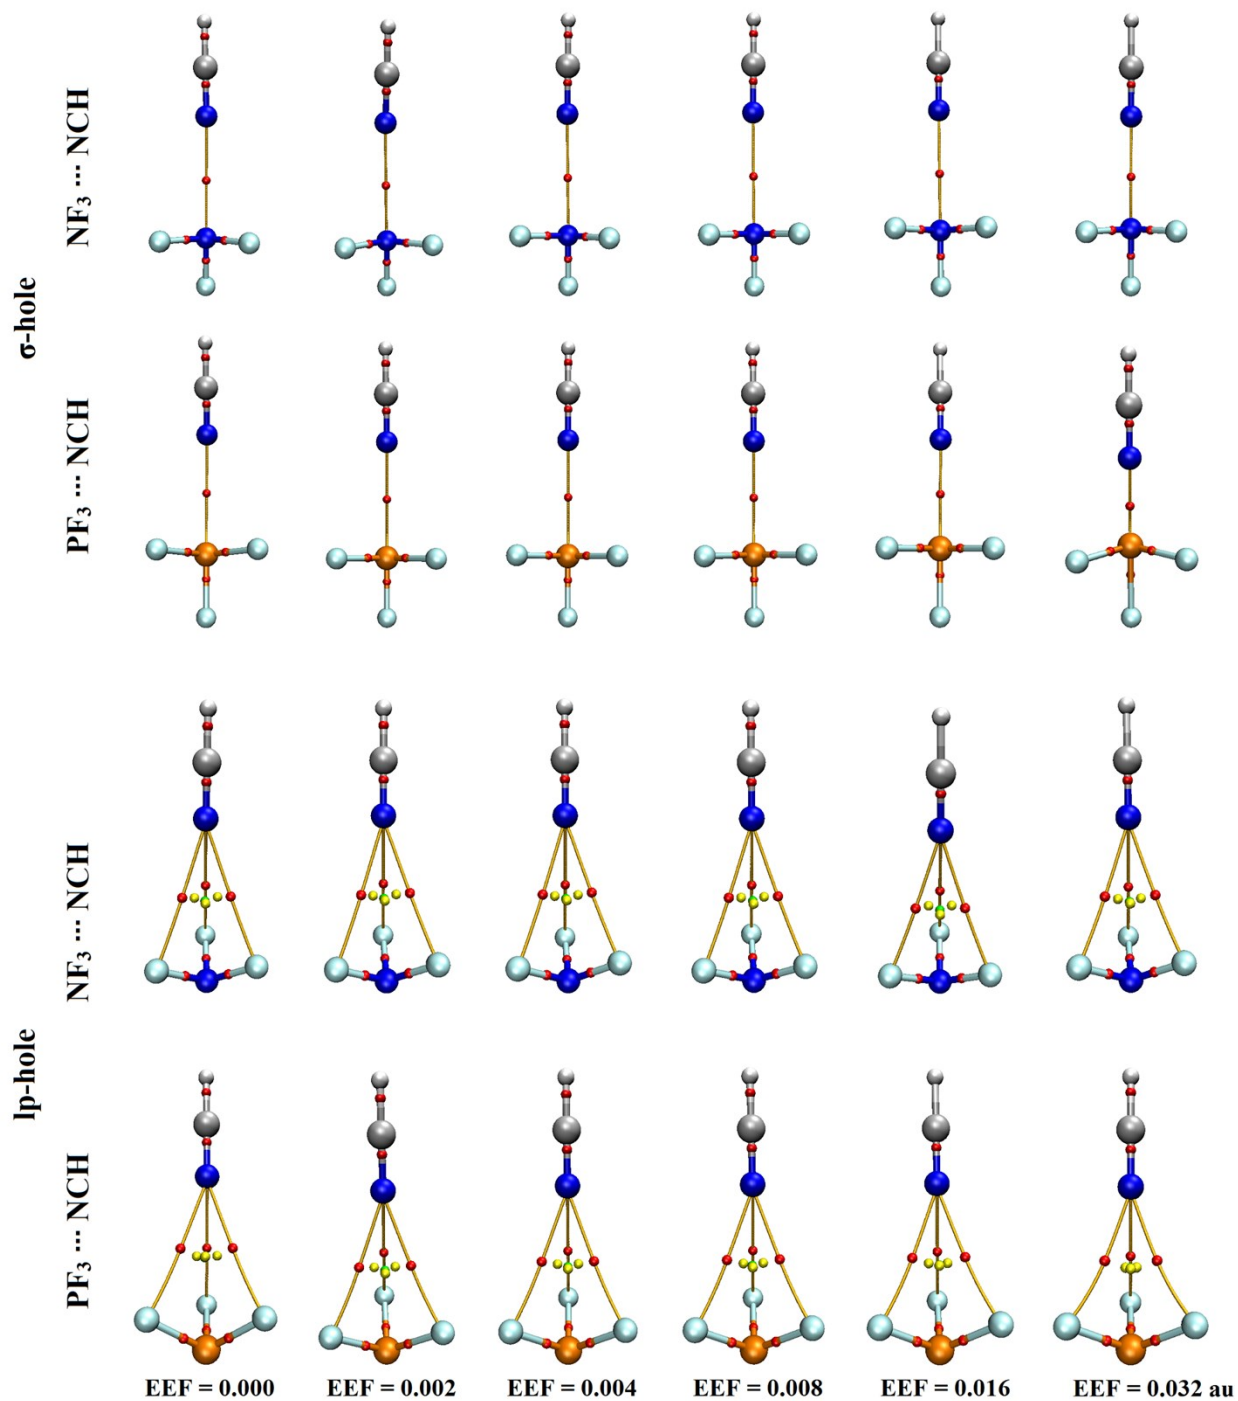

**Figure S3.** Quantum theory of atoms in molecules (QTAIM) diagrams for  $\sigma$ -hole... and lp-hole...NCH interactions under the field-free conditions and the influence of the positively-directed external electric field (EEF). Red dots indicate the locations of bond critical points (BCPs) at bond paths (BPs).

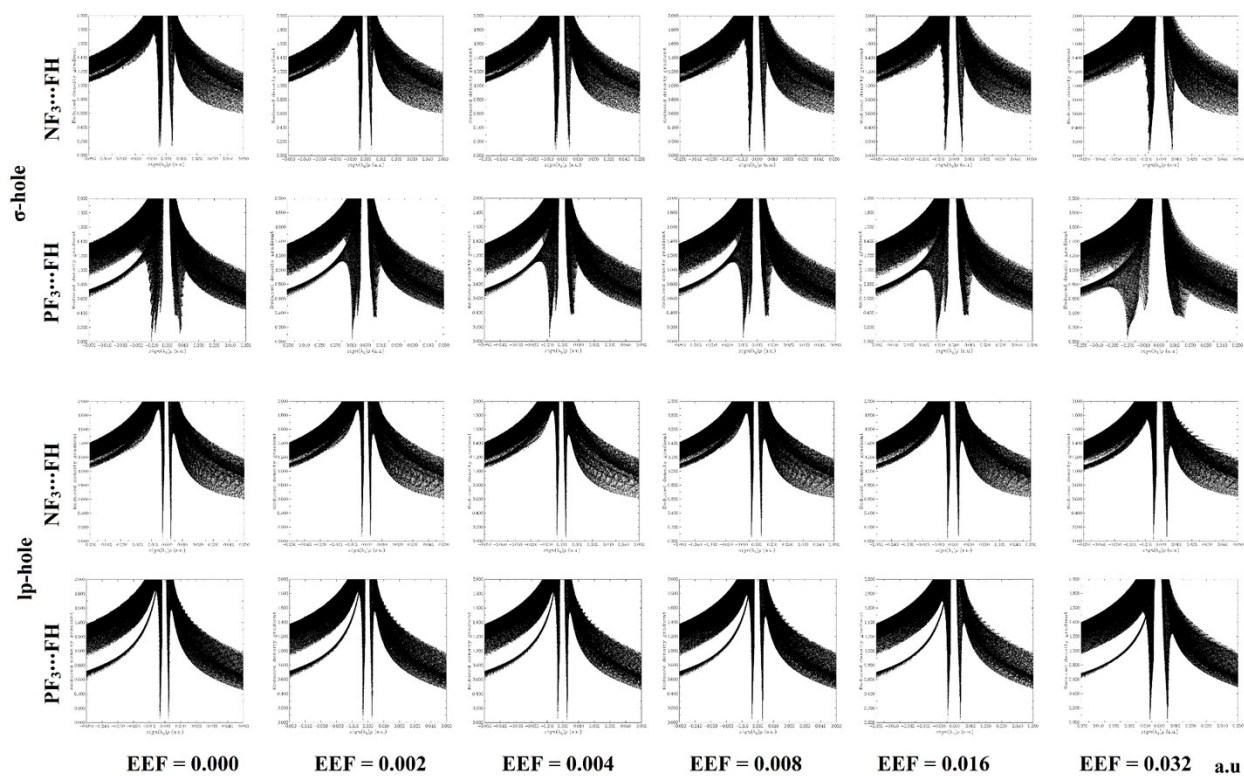

**Figure S4.** 2D NCI diagrams of the RDG versus the electron density multiplied by the sign of the second Hessian eigenvalue for the optimized  $\text{NF}_3 \cdots$  and  $\text{PF}_3 \cdots \text{FH}$  complexes under the field-free conditions and the influence of the positively-directed external electric field (EEF).

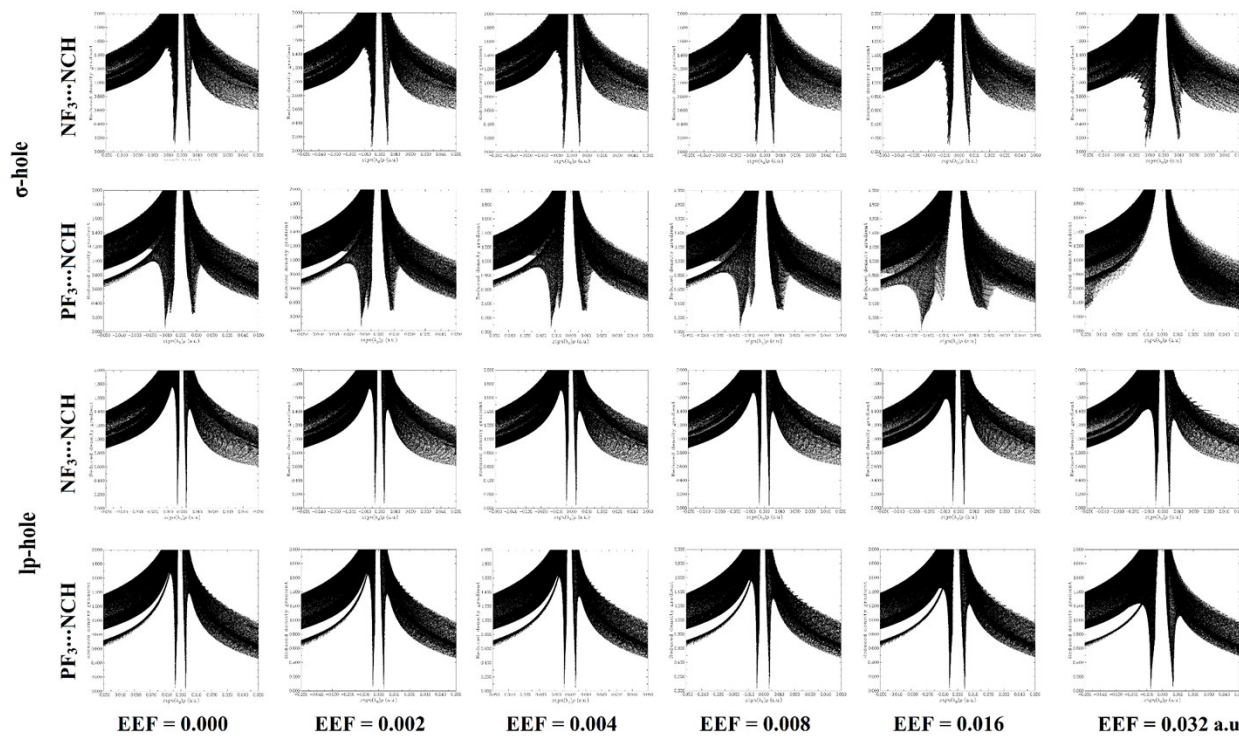

**Figure S5.** 2D NCI diagrams of the RDG versus the electron density multiplied by the sign of the second Hessian eigenvalue for the optimized NF<sub>3</sub>... and PF<sub>3</sub>...NCH complexes under the field-free conditions and the influence of the positively-directed external electric field (EEF).

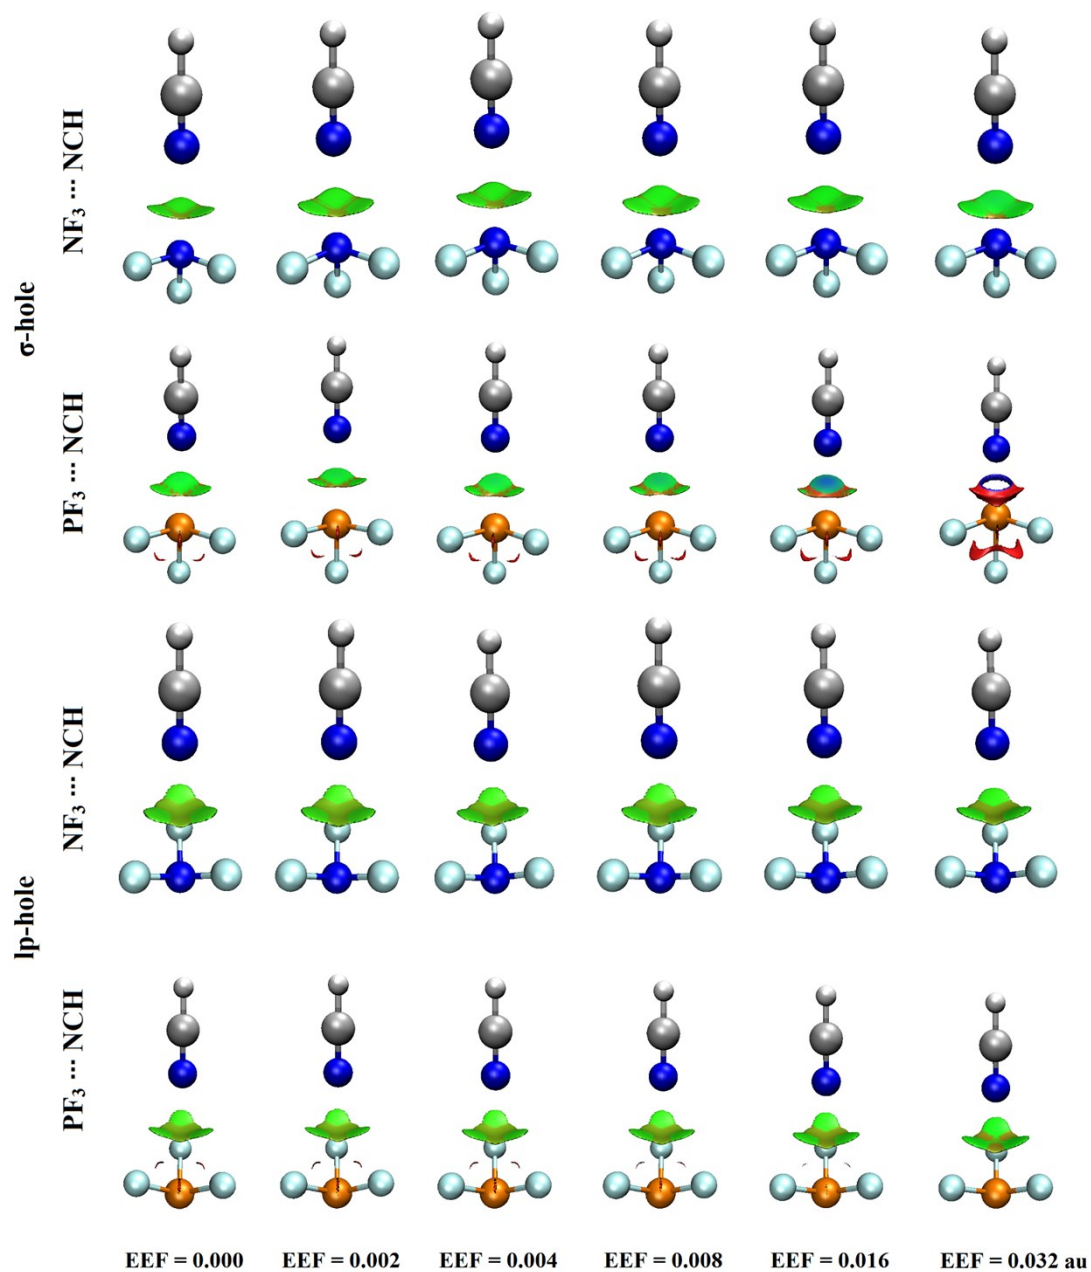

**Figure S6.** 3D NCI plots of for the optimized  $\text{NF}_3 \cdots$  and  $\text{PF}_3 \cdots \text{NCH}$  complexes under the field-free conditions and the influence of the positively-directed external electric field (EEF). The isosurfaces plotted with a reduced density gradient value of 0.50 au and colored from blue to red according to  $\text{sign}(\lambda_2)\rho$  ranging from -0.035 (blue) to 0.020 (red) au.

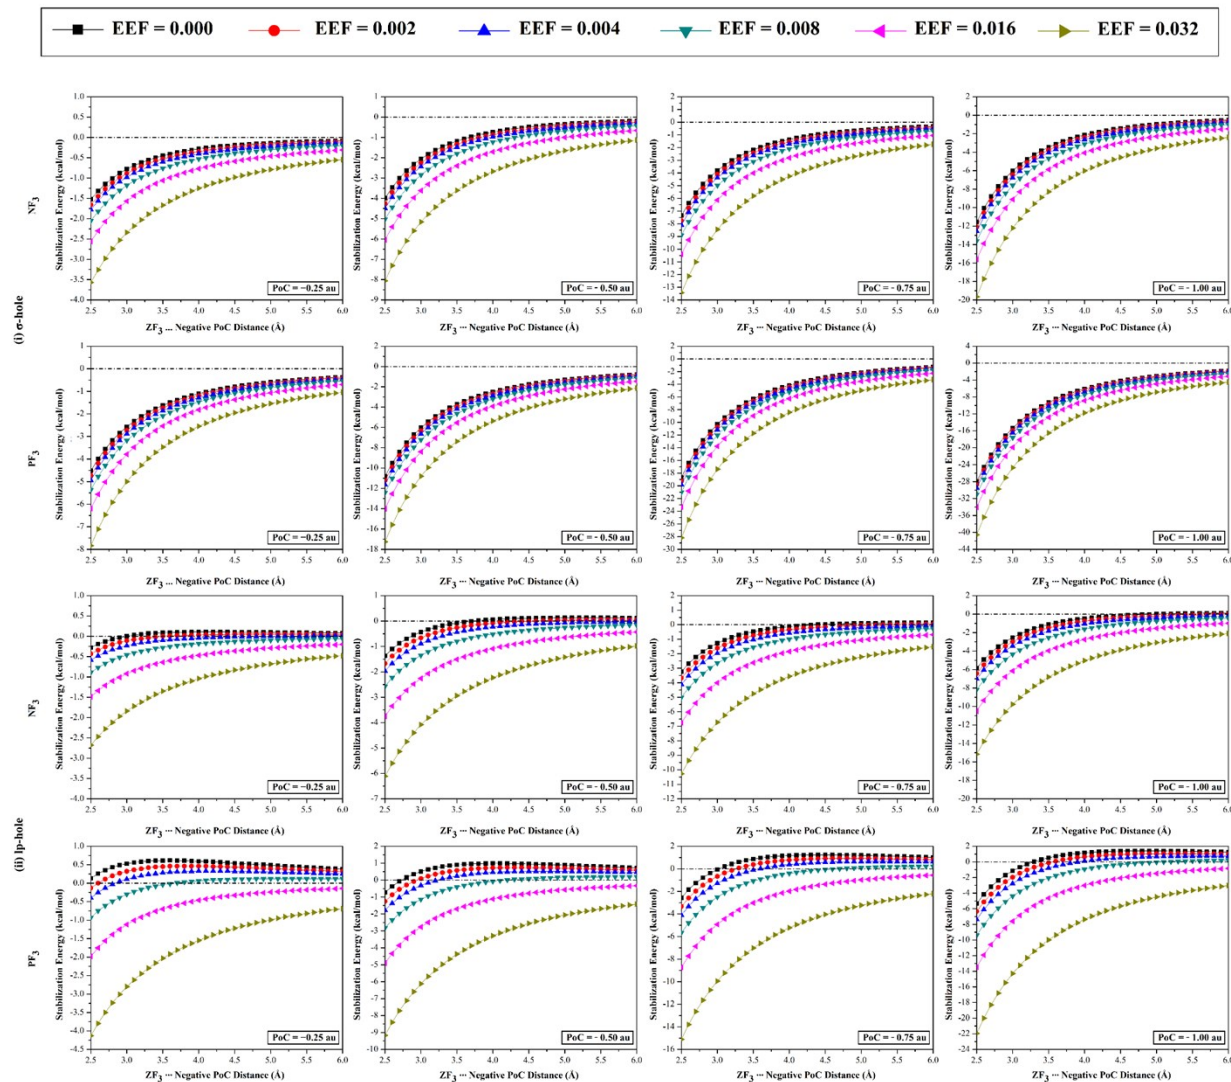

**Figure S7.** Molecular stabilization energy curves for (i)  $\sigma$ -hole $\cdots$  and (ii) lp-hole $\cdots$ PoC interactions in the  $ZF_3\cdots$ PoC systems (where  $Z = N$  and  $P$ ) calculated at  $Z\cdots$ PoC distance range of 2.5–6.0 Å under the field free condition and the influence of the positively-directed external electric field (EEF) with values ranging from 0.002 to 0.032 au in the presence of PoC values of  $-0.25$ ,  $-0.50$ ,  $-0.75$ , and  $-1.00$  au.
